# Supplementary material for: Predicting the performance of polyvinylidene fluoride, polyethersulfone and polysulfone filtration membranes using machine learning
Source: Royal Society of Chemistry journal article supplement (doi:10.1039/d0ta07607d), 2020-01-01
Supplement: d0ta07607d1.pdf [file d0ta07607d1.pdf]

## Supporting Information

### **Predicting the performance of polyvinylidene fluoride, polyethersulfone and polysulfone filtration membranes using machine learning**

Tingli Liu,<sup>ab</sup> Lunyang Liu,<sup>\*ab</sup> Fengchao Cui,<sup>ab</sup> Fang Ding,<sup>ab</sup> Qifeng Zhang<sup>ab</sup> and Yunqi Li<sup>\*ab</sup>

<sup>a</sup> Key Laboratory of High-Performance Synthetic Rubber and its Composite Materials & Key Laboratory of Polymer Ecomaterials, Changchun Institute of Applied Chemistry (CIAC), Chinese Academy of Sciences, Changchun 130022, China;

<sup>b</sup> University of Science and Technology of China, Hefei 230026, China.

\* To whom correspondence should be addressed. E-mail: [lyliu@ciac.ac.cn](mailto:lyliu@ciac.ac.cn);

[yunqi@ciac.ac.cn](mailto:yunqi@ciac.ac.cn). Phone: +86 (0)431 85262535

## Figures and Tables in supplementary

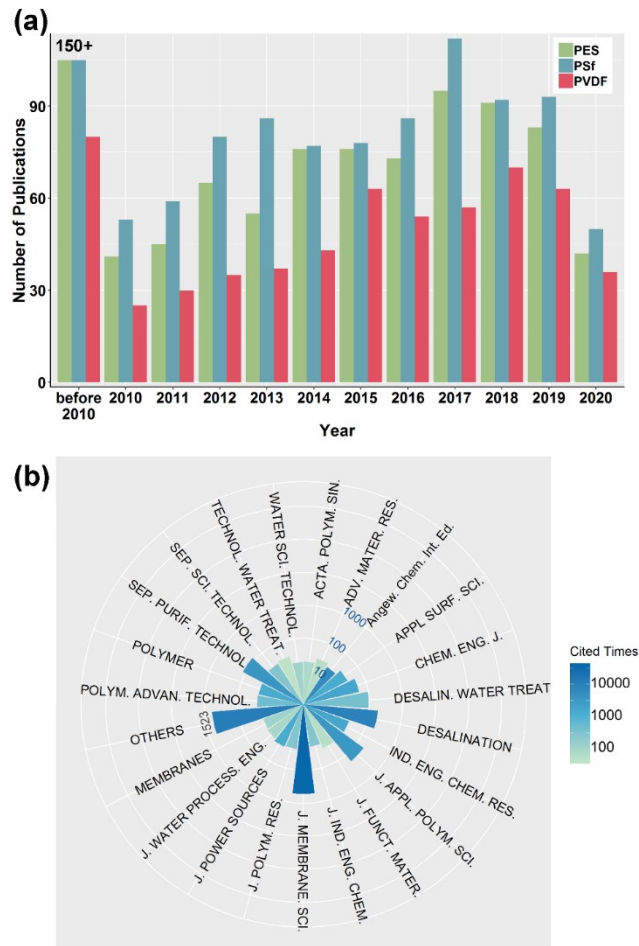

**Fig. S1** (a) The histogram of annual publications for polyethersulfone, polysulfone and polyvinylidene fluoride filtration membranes, and (b) the distribution of these publications and their citations in various journals, the height and the color of bars correspond to the number of publications and the cited times accumulated in each journal, respectively.

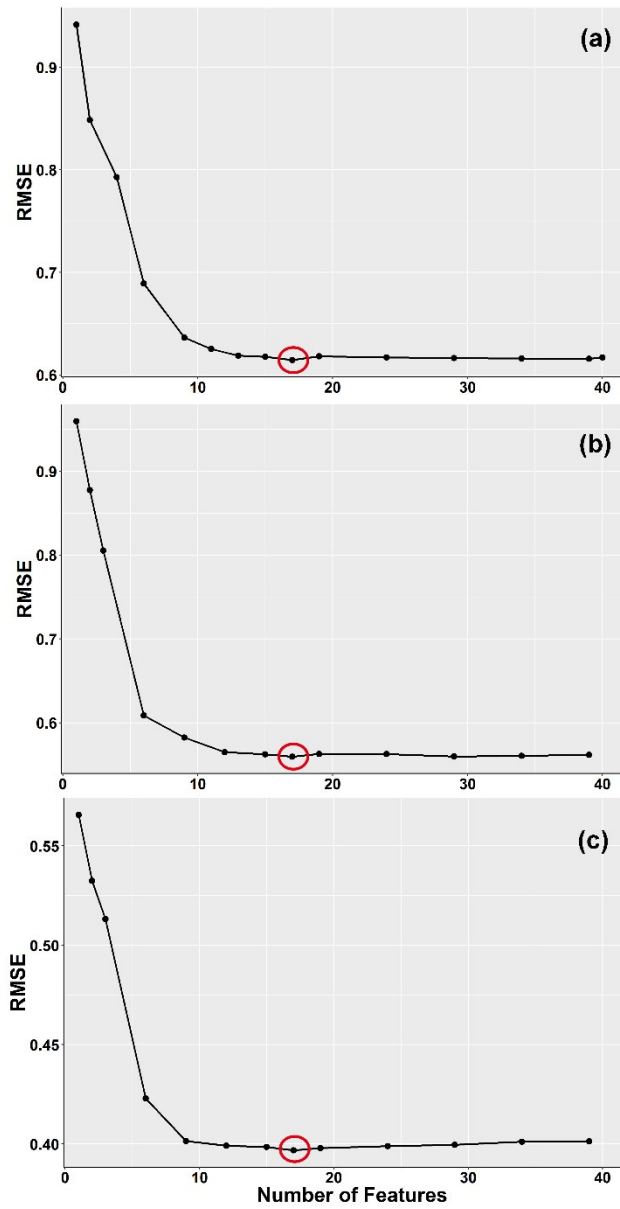

**Fig. S2** The Root-Mean Square Error (RMSE) in the numeric regression for  $L_p$  (a),  $1/S_0$  (b) and  $Tr$  (c) using Recursive Feature Elimination against the number of features. The red circle labeled the number of features (17) that finally engaged in predictive model construction.

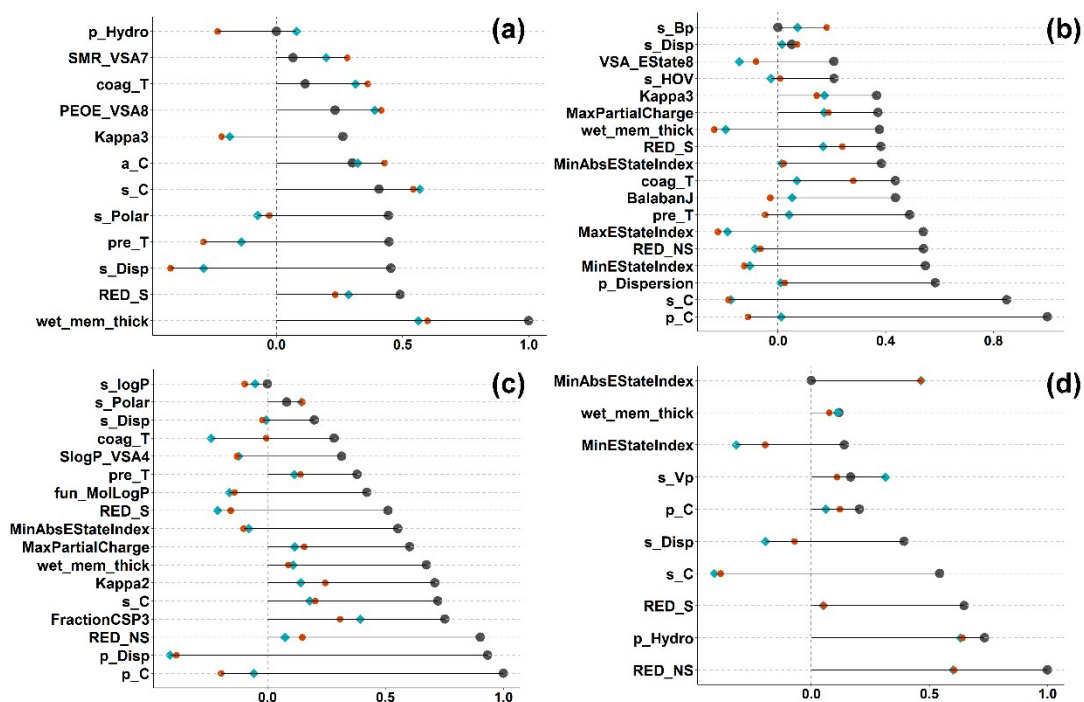

**Fig. S3** The ranking of feature importance using RF algorithm (grey circle), Pearson correlation coefficient ( $R_p$ , blue diamond) and Spearman correlation coefficient ( $R_s$ , red dot) between features and structure parameters including thickness (a), porosity (b), surface water contact angle (CA) (c) and surface roughness (Sa) (d).

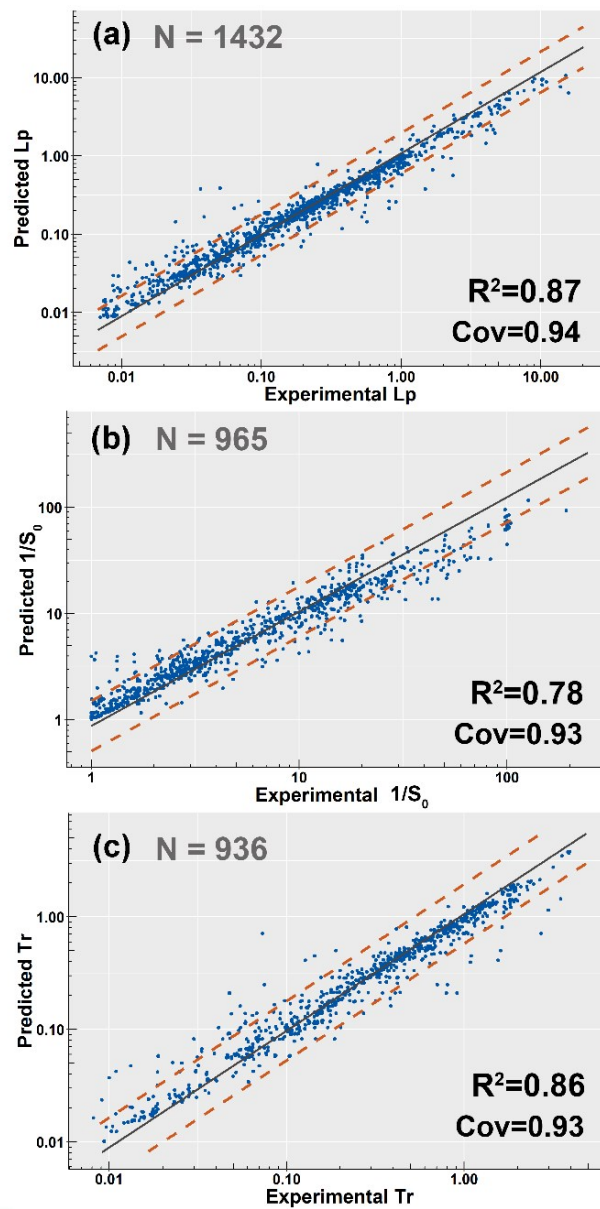

**Fig. S4** Plots for the predicted vs. experimental values for models integrated four structural features in the prediction of  $L_p$  (a),  $1/S_0$  (b) and  $Tr$  (c). The orange dashed lines indicate the upper and lower cutoff at 95% confidential coverage.

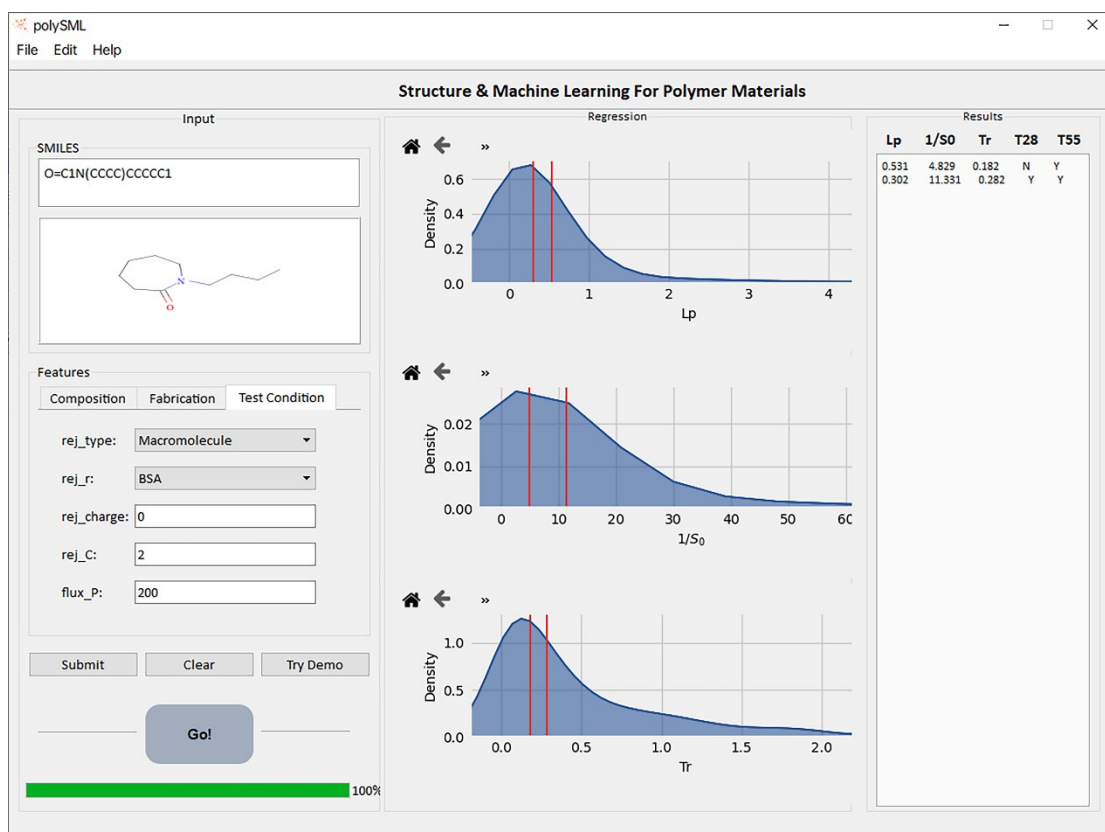

**Fig. S5** The user interface of polySML. Parameters in composition, fabrication and test condition, as well as the chemical structure of additives can be readily adjusted in virtual experiments. Predicted performance indexes in the reference to the whole dataset are illustrated and exact predicted values and classification are presented.

**Table S1** Description of Features in the construction of predictive models for PES/PSF/PVDF micro-/ultra-/nano-filtration membranes.

| ID | Category                        | Feature       | Unit | Description                                                                 |
|----|---------------------------------|---------------|------|-----------------------------------------------------------------------------|
| 1  | Composition of casting solution | p_C           |      | The weight fraction of base polymer                                         |
| 2  |                                 | a_C           | wt%  | The weight fraction of addition agent in casting solution                   |
| 3  |                                 | s_C           |      | The weight fraction of solvent in casting solution                          |
| 4  |                                 | p_Dis         |      | Hansen solubility parameter (Dispersion force for monomer in polymer)       |
| 5  |                                 | s_Dis         |      | Hansen solubility parameter (Dispersion force for solvent)                  |
| 6  |                                 | RED_S         | -    | The relative energy difference between base polymer and solvent             |
| 7  |                                 | RED_NS        |      | The relative energy difference between base polymer and non-solvent         |
| 8  |                                 | s_Bp          | °C   | Boiling point for solvent and non-solvent                                   |
| 9  |                                 | s_Vp          | mmHg | The saturated vapor pressure at 25°C for solvent and non-solvent            |
| 10 |                                 | HDT           | °C   | Heat Deflection Temperature with loading of 1.8MPa                          |
| 11 | Fabrication and test conditions | coag_T        | °C   | The temperature of coagulation bath                                         |
| 12 |                                 | pre_T         | °C   | The temperature during membrane formation                                   |
| 13 |                                 | exposed.time  | s    | The exposed time before immersing the casting solution into the non-solvent |
| 14 |                                 | wet_mem_thick | μm   | The thickness of solution on the substrate controlled by the scraper        |
| 15 |                                 | flux_P        | kPa  | Transmembrane pressure in performance measurement                           |
| 16 |                                 | rej_C         | wt%  | The concentration of substance (protein, salt etc.) in feeding flux         |

|    |                                        |                   |    |                                                             |
|----|----------------------------------------|-------------------|----|-------------------------------------------------------------|
| 17 |                                        | rej_type          | -  | The type of separation substance                            |
| 18 |                                        | rej_charge        | -  | The charge of separation substance                          |
| 19 |                                        | rej_r             | nm | The radius of rejection substance                           |
| 20 |                                        | thickness         | µm | Thickness of dry membrane                                   |
| 21 |                                        | porosity          | %  | Volume fraction of water accessible voids in membrane       |
| 22 | Structure parameters                   | CA                | °  | Water static contact angle on membrane surface              |
| 23 |                                        | Sa                | nm | Mean roughness of membrane surface                          |
| 24 |                                        | fun_MolLogP       |    | Wildman-Crippen LogP value of the functional group          |
| 25 |                                        | MolLogP           |    | Wildman-Crippen LogP value                                  |
| 26 |                                        | Kappa2            |    | Hall-Kier Kappa values, Rev. Comput. Chem. 2:367-422 (1991) |
| 27 |                                        | Kappa3            |    | Hall-Kier Kappa values, Rev. Comput. Chem. 2:367-422 (1991) |
| 28 | Computational features based on SMILES | MinAbsEStateIndex | -  | Minimum absolute value of Estate index                      |
| 29 |                                        | MinEStateIndex    |    | Minimum value of Estate index                               |
| 30 |                                        | MinPartialCharge  |    | Minimum partial charge of molecular                         |
| 31 |                                        | MaxPartialCharge  |    | Maximum partial charge of molecular                         |
| 32 |                                        | FractionCSP3      |    | Fraction of C atoms that are SP3 hybridized.                |



**Table S2** Prediction evaluation for performance indexes with structure features using Random Forest. Structure information has the best positive impact on the predictive models were shown in bold.

| Performance index      | Without structure feature |             | With structure feature |                   |                |             |
|------------------------|---------------------------|-------------|------------------------|-------------------|----------------|-------------|
|                        | R <sup>2</sup>            | Cov         | Feature added          | Number of Vectors | R <sup>2</sup> | Cov         |
| <b>Lp</b>              | 0.85                      | 0.83        | porosity               | 845               | 0.89           | 0.94        |
|                        |                           |             | <b>CA</b>              | <b>765</b>        | <b>0.91</b>    | <b>0.94</b> |
|                        |                           |             | thickness              | 298               | 0.90           | 0.95        |
|                        |                           |             | Sa                     | 196               | 0.87           | 0.93        |
| <b>1/S<sub>0</sub></b> | <b>0.79</b>               | <b>0.94</b> | <b>porosity</b>        | <b>610</b>        | <b>0.83</b>    | <b>0.93</b> |
|                        |                           |             | CA                     | 551               | 0.80           | 0.94        |
|                        |                           |             | thickness              | 208               | 0.76           | 0.92        |
|                        |                           |             | Sa                     | 141               | 0.76           | 0.92        |
| <b>Tr</b>              | 0.83                      | 0.92        | porosity               | 591               | 0.81           | 0.94        |
|                        |                           |             | <b>CA</b>              | <b>541</b>        | <b>0.89</b>    | <b>0.94</b> |
|                        |                           |             | <b>thickness</b>       | <b>206</b>        | <b>0.89</b>    | <b>0.95</b> |
|                        |                           |             | <b>Sa</b>              | <b>133</b>        | <b>0.89</b>    | <b>0.93</b> |
